# Supplementary material
Source: publisher site journal article supplement (https://www.degruyterbrill.com/publication/isbn/9783110317756/downloadAsset/9783110317756_Inhaltsverzeichnis.pdf)
Supplement: Supplementary file 1 [file 9783110317756_Inhaltsverzeichnis.pdf]

## Inhaltsverzeichnis

|                                                                                                                                                                                                         |     |
|---------------------------------------------------------------------------------------------------------------------------------------------------------------------------------------------------------|-----|
| ANNA HEINZE, SEBASTIAN MÖCKEL, WERNER RÖCKE<br>Auf den Grenzen der Antike. Eine Einleitung . . . . .                                                                                                    | 1   |
| STEPHAN GÜNZEL<br>Raumteilungen: Logik und Phänomen der Grenze . . . . .                                                                                                                                | 15  |
| ALBRECHT KOSCHORKE<br>Exodus. Gesetzgebung und Landnahme im kulturellen Gedächtnis<br>Europas . . . . .                                                                                                 | 27  |
| MARTIN HOSE<br>Klemens von Alexandrien und die Grenze zwischen Christen und<br>Heidentum . . . . .                                                                                                      | 39  |
| JULIA WEITBRECHT<br>Die <i>ordenunge dirre welte</i> . Narrativierung und Integration antiken Wissens<br>im mittelhochdeutschen <i>Lucidarius</i> . . . . .                                             | 55  |
| ROBERTO SANCHIÑO MARTÍNEZ<br>Dionysos und die »Grenzen des schönsten Gebildes«. Martin Heideggers<br>erster Griechenlandaufenthalt im Kontext seiner Re-Definition der<br>griechischen Antike . . . . . | 69  |
| ALEIDA ASSMANN<br>Die Grenze zwischen Lebenden und Toten. Unterweltreisen<br>in der klassischen Moderne . . . . .                                                                                       | 99  |
| ALBRECHT DRÖSE<br>Von Vorzeichen und Zwischenwesen. Transformationen antiker<br>Prodiendeutung bei Brant und Luther . . . . .                                                                           | 117 |
| CHRISTOPHER CELENZA<br>Lorenzo Valla und das Neue Testament . . . . .                                                                                                                                   | 145 |

MICHAEL WEICHENHAN

Wissen über Grenzen: Die Entdeckung der indischen Philosophie  
und die Pluralisierung der Antike . . . . . 169

ANNETTE DORGERLOH

Der Limes als Kulturgrenze und seine Reflexion in herrschaftlichen Gärten  
um 1800: Eulbach und seine Vorgänger . . . . . 209

EVA MARLENE HAUSTEINER

Rasse, Raum und Rom – Grenzkonstruktionen im British Empire . . . . . 241

OLIVER LEEGE

Griechische Grenzverschiebungen. Transformationen des Hellas-Bildes  
im griechischen Nationalstaat . . . . . 259

MARCUS BECKER

Remus in Rheinsberg oder Leaping the fence the other way.  
Über die Funktionalität von Grenzziehungen in Gartenprogrammen  
des 18. Jahrhunderts . . . . . 291

FRIEDERIKE KRIPPNER

»Historische Richtigkeit« und die Grenzen des Wissens.  
Die Pluralisierung der Altertümer durch Karl von Brühls Berliner  
Kostümreform 1815–1828 . . . . . 325

RONNY KAISER

Kanonisierung und neue Deutungsräume. Die Grenzen der Antike  
in Andreas Althamers *Commentaria* zur *Germania* des Tacitus (1536) . . . 353

SEBASTIAN HUHNHOLZ

Vom Imperium zur Souveränität und zurück. Raumpolitische Geltungs-  
grenzen zwischen Jean Bodins antiimperialem Souveränitätsverständnis  
und Carl Schmitts postsouveräner Imperiumsfurcht . . . . . 377

Register . . . . . 411
